# Supplementary material for: PPARγ Modulates Long Chain Fatty Acid Processing in the Intestinal Epithelium
Source: PubMed Central journal article supplement (PMC5751162; doi:10.3390/ijms18122559), 2017-11-28
Supplement: ijms-18-02559-s001.pdf [file ijms-18-02559-s001.pdf]

# PPAR $\gamma$ Modulates Long Chain Fatty Acid Processing in the Intestinal Epithelium

Kalina Duszka <sup>1,2,3</sup>, Matej Oresic <sup>4</sup>, Cedric Le May <sup>5</sup>, Jürgen König <sup>3,6</sup> and Walter Wahli <sup>1,2,7,\*</sup>

<sup>1</sup> Lee Kong Chian School of Medicine, Nanyang Technological University, 11 Mandalay Road, Singapore 308232, Singapore; Kalina.duszka@univie.ac.at

<sup>2</sup> Center for Integrative Genomics, University of Lausanne, Génopode, CH-1015 Lausanne, Switzerland

<sup>3</sup> Department of Nutritional Sciences, University of Vienna, Althanstrasse 14, 1090 Vienna, Austria; juergen.koenig@univie.ac.at

<sup>4</sup> Turku Centre for Biotechnology, University of Turku and Åbo Akademi University, Tykistökatu 6, 20520 Turku, Finland; matej.oresic@utu.fi

<sup>5</sup> Institut du Thorax, INSERM, CNRS, UNIV Nantes, 44007 Nantes, France; cedric.lemay@univ-nantes.fr

<sup>6</sup> Vienna Metabolomics Center (VIME), University of Vienna, Althanstrasse 14, 1090 Vienna, Austria

<sup>7</sup> ToxAlim, Research Center in Food Toxicology, National Institute for Agricultural Research (INRA), 180 Chemin de Tournefeuille, 31300 Toulouse, France

\* Correspondence: Walter.Wahli@ntu.edu.sg; Tel.: +65-6592-3927 or +65-9026-6430

Table S1: Relative expression of mRNA transcripts assayed by RT-qPCR

|                                                                    |            | Canola oil      |                    | Coconut oil     |                    |
|--------------------------------------------------------------------|------------|-----------------|--------------------|-----------------|--------------------|
| Gene                                                               | Time point | WT              | iePPAR $\gamma$ KO | WT              | iePPAR $\gamma$ KO |
| <b>Relative mRNA expression<br/>(normalized to reference gene)</b> |            |                 |                    |                 |                    |
| <b>Hormones</b>                                                    |            |                 |                    |                 |                    |
| Cck                                                                | 2h         | 3.94 $\pm$ 0.20 | 3.05 $\pm$ 0.34    |                 |                    |
|                                                                    | 3h         | 3.95 $\pm$ 0.63 | 3.71 $\pm$ 0.31    |                 |                    |
| Dpp4                                                               | 2h         | 3.11 $\pm$ 0.37 | 1.71 $\pm$ 0.21    |                 |                    |
|                                                                    | 3h         | 2.68 $\pm$ 0.61 | 2.01 $\pm$ 0.30    |                 |                    |
| Gip                                                                | 2h         | 4.09 $\pm$ 0.29 | 3.26 $\pm$ 0.27    |                 |                    |
|                                                                    | 3h         | 3.75 $\pm$ 0.57 | 3.35 $\pm$ 0.22    |                 |                    |
| Secretin                                                           | 2h         | 2.95 $\pm$ 0.26 | 2.62 $\pm$ 0.53    |                 |                    |
|                                                                    | 3h         | 4.21 $\pm$ 0.45 | 2.56 $\pm$ 0.23    |                 |                    |
| <b>Lipid metabolism</b>                                            |            |                 |                    |                 |                    |
| Cd36                                                               | 2h         | 3.81 $\pm$ 0.83 | 0.46 $\pm$ 0.15    | 4.04 $\pm$ 0.84 | 3.60 $\pm$ 0.91    |
|                                                                    | 3h         | 1.44 $\pm$ 0.18 | 2.63 $\pm$ 0.74    | 3.69 $\pm$ 0.53 | 2.14 $\pm$ 0.44    |
| Dgat2                                                              | 2h         | 3.32 $\pm$ 0.29 | 1.02 $\pm$ 0.27    | 3.85 $\pm$ 0.51 | 2.93 $\pm$ 0.45    |
|                                                                    | 3h         | 3.65 $\pm$ 0.25 | 2.26 $\pm$ 0.21    | 3.66 $\pm$ 0.33 | 3.55 $\pm$ 0.20    |
| Agpat9                                                             | 2h         | 4.01 $\pm$ 0.51 | 2.14 $\pm$ 0.27    |                 |                    |
|                                                                    | 3h         | 3.14 $\pm$ 0.66 | 1.87 $\pm$ 0.38    |                 |                    |
| Acot11                                                             | 2h         | 2.64 $\pm$ 0.46 | 2.66 $\pm$ 0.50    |                 |                    |
|                                                                    | 3h         | 3.64 $\pm$ 0.69 | 2.13 $\pm$ 0.17    |                 |                    |
| Fasn                                                               | 2h         | 2.79 $\pm$ 0.63 | 1.21 $\pm$ 0.24    | 2.31 $\pm$ 0.28 | 2.25 $\pm$ 0.38    |
|                                                                    | 3h         | 3.82 $\pm$ 0.61 | 3.03 $\pm$ 0.25    | 3.08 $\pm$ 0.30 | 3.44 $\pm$ 0.56    |
| Mlycd                                                              | 2h         | 3.61 $\pm$ 0.39 | 3.93 $\pm$ 0.35    |                 |                    |

|                     |    |             |             |             |             |
|---------------------|----|-------------|-------------|-------------|-------------|
|                     | 3h | 2.58 ± 0.24 | 1.86 ± 0.09 |             |             |
| Cact                | 2h | 3.63 ± 0.34 | 4.12 ± 0.32 |             |             |
|                     | 3h | 3.05 ± 0.27 | 1.91 ± 0.12 |             |             |
| Hsl                 | 2h | 1.43 ± 0.23 | 1.00 ± 0.20 | 3.99 ± 0.73 | 3.44 ± 0.55 |
|                     | 3h | 3.96 ± 0.62 | 2.59 ± 0.21 | 3.72 ± 0.47 | 2.71 ± 0.24 |
| Atgl                | 2h | 4.00 ± 0.64 | 0.38 ± 0.09 | 3.81 ± 0.21 | 3.64 ± 0.61 |
|                     | 3h | 2.00 ± 0.18 | 2.58 ± 0.69 | 3.46 ± 0.33 | 3.01 ± 0.17 |
| Tip47               | 2h | 3.77 ± 0.79 | 1.95 ± 0.12 | 4.00 ± 0.38 | 2.27 ± 0.42 |
|                     | 3h | 1.79 ± 0.11 | 1.77 ± 0.44 | 3.39 ± 0.31 | 3.23 ± 0.28 |
| Mttp                | 2h | 3.31 ± 0.47 | 3.38 ± 0.72 |             |             |
|                     | 3h | 3.33 ± 0.37 | 2.03 ± 0.18 |             |             |
| Fxr                 | 2h | 4.02 ± 0.78 | 1.05 ± 0.13 | 3.86 ± 0.34 | 3.57 ± 0.28 |
|                     | 3h | 1.84 ± 0.14 | 1.40 ± 0.12 | 3.45 ± 0.23 | 3.13 ± 0.23 |
| <b>Hypothalamus</b> |    |             |             |             |             |
| Npy                 | 2h | 3.61 ± 0.57 | 3.61 ± 0.69 |             |             |
|                     | 3h | 3.03 ± 0.45 | 1.59 ± 0.33 |             |             |
| Mchr1               | 2h | 4.06 ± 0.22 | 4.24 ± 0.23 |             |             |
|                     | 3h | 3.51 ± 0.11 | 3.86 ± 0.12 |             |             |

Table S2: RT-qPCR primers

|        | Forward                 | Reverse                  |
|--------|-------------------------|--------------------------|
| Abca1  | GCACTGAGGAAGATGCTGAAA   | AGTTCCTGGAAGGTCTTGTTACAC |
| Abcg5  | CAGCAGCGTGTTGTATTGGA    | AGCCGCGCACAGCAATACC      |
| Acot11 | CAGCCAGCCGGCTCTGTACAC   | CACCTGAGACGGGCCTCGGA     |
| Agpat9 | CACCTGGCTGACGCTGGTGG    | GCTGACTCCTTGGGGGCTCCT    |
| ApoAIV | ACAGTTTCAGAAGACGGATGTCA | CGTACTAGCATCCCCAAGTTTG   |
| ApoB   | CCCCGTGCAAGAAGACTGGCTGA | GGGAGCATTGTTAGGTTGAGGGC  |
| ATGL   | CCTGCCTGGGTGATCTTGAG    | CTTGGCAGGCATGGGACATA     |
| Atp5e  | CCGGCAGATGGCGTAACAG     | ACACATTTGCCCGAAGTCCATTG  |
| Cact   | GGCAGACGAGCCGAAACCCA    | TCCAGGGGGTGCCCCACAAA     |
| CCK    | CCAATTTTTCTGCCCCGCAT    | AGAAGGAGCAGTCAAGCCAAA    |
| CD36   | TGATACTATGCCCGCCTCTCC   | TTTCCCACACTCCTTTCTCCTCTA |
| FASN   | CAGAAATCGCCTATGGTTGTTG  | GCTCAGCTGTGTCTTGGATGC    |
| FXR    | ACCCAGAGAAGAACCGAGT     | ACTTCTGGGATGGTGGTCTCCT   |

|        |                          |                           |
|--------|--------------------------|---------------------------|
| GIP    | AGAGAGAGGCCCGGGCTTTGG    | TCACTGAGACCTGAGTCGGCAG    |
| HSL    | TCAGGGACAGAGGCAGAGGAC    | TCCACTTAGTTCCAGGAAGGAGTTG |
| Mttp   | CCCGGGAAGCAAGTGGCAGG     | TGCTCCGCCAGAGAAGGGCA      |
| NPY    | CAGAAAACGCCCCAGAACA      | GGGGATGGATGAGATGAGATGA    |
| Ppap2a | TGTTGCTGGCTGCCATGCCT     | GCCAAGCCCCAGTATGGCGA      |
| PPARa  | TCCTCAGTCAGCTGCCCCGT     | ACCCTGAGGCCTTGTCCCCAC     |
| PPARg  | AGACCCAGCTCTACAACAGGCC   | CAGACTCGGCACTCAATGGCCA    |
| TIP47  | ATGGAATCCGTGAAACAGGGTGTG | TGAGAGGTCCTGGAAGGAGTGAAT  |
| Vt1a   | GAGGCTGGGTACCAGATAGCA    | CGCTGTATCTTTTCTCTGTCATGA  |

Primers not listed were purchased from Qiagen.

## Supplementary figure 1

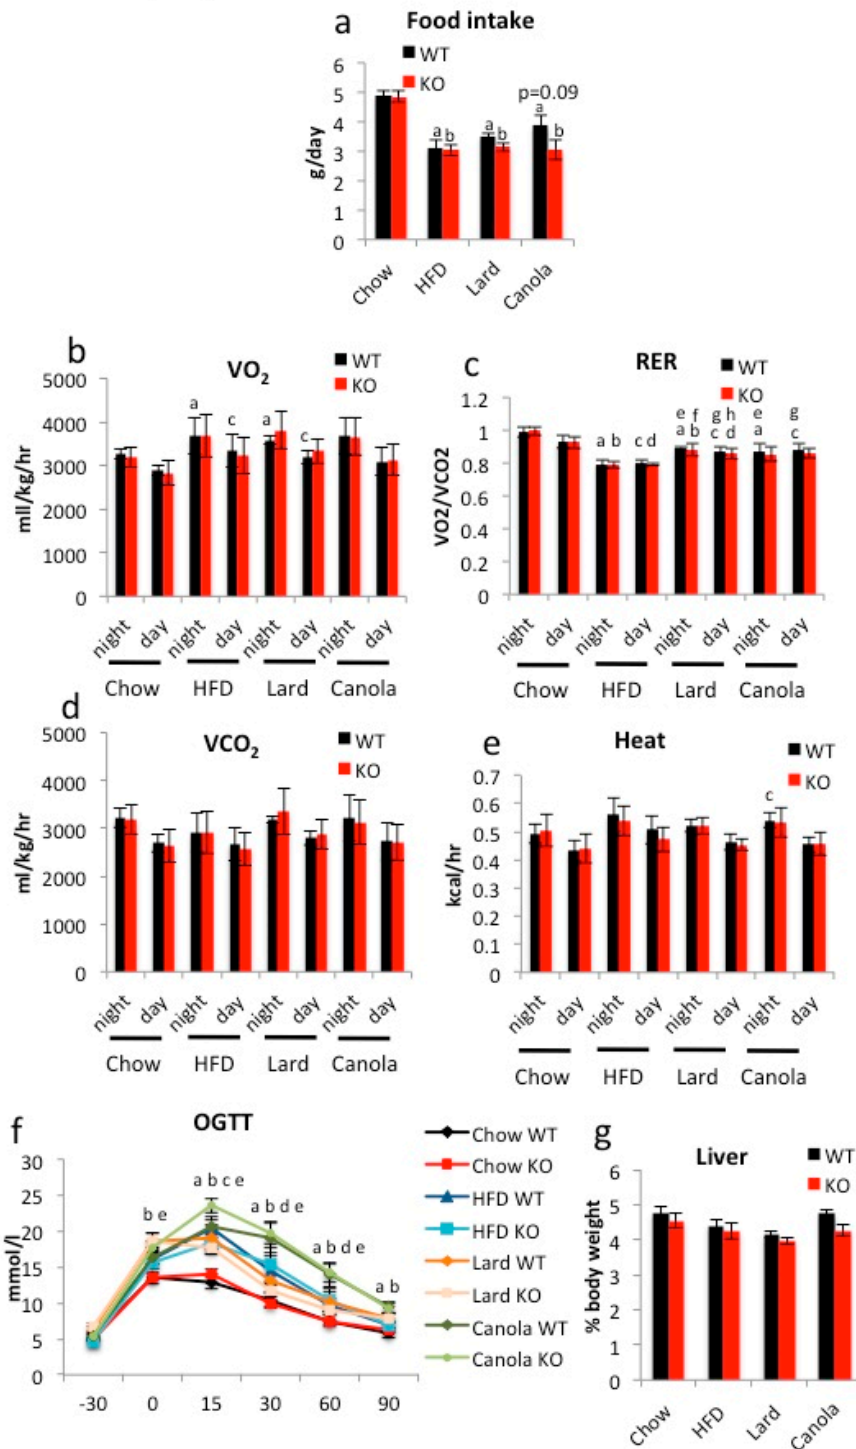

**Figure S1. Parameters of fatty diet-fed iePPAR $\gamma$ KO and WT mice.**

(a) Food intake of mice fed different diets (n=7-10). <sup>a</sup>Significant difference between the labeled group and 0 h WT, <sup>b</sup>significant difference between the labeled group and 0 h KO. (b) Using indirect calorimetry, VO<sub>2</sub>, (c) VCO<sub>2</sub>, (d) RER, and (e) heat production during day and at night were assessed in mice (n=6-9). The symbols correspond to significant differences for the following data sets: <sup>a</sup>WT chow night; <sup>b</sup>KO chow night; <sup>c</sup>WT chow day;

<sup>d</sup>KO chow day; <sup>e</sup>WT HFD night; <sup>f</sup>KO HFD night; <sup>g</sup>WT HFD day; <sup>h</sup>KO HFD day. (f) The plasma glucose level was monitored over 2 hours (n=5-9) following glucose gavage. (g) The liver weight was recorded and presented as % of total body weight (n=7-10). One-way ANOVA followed by the Bonferroni post-hoc test was used to compare the experimental groups. All data are presented as mean  $\pm$  SEM.

## Supplementary figure 2

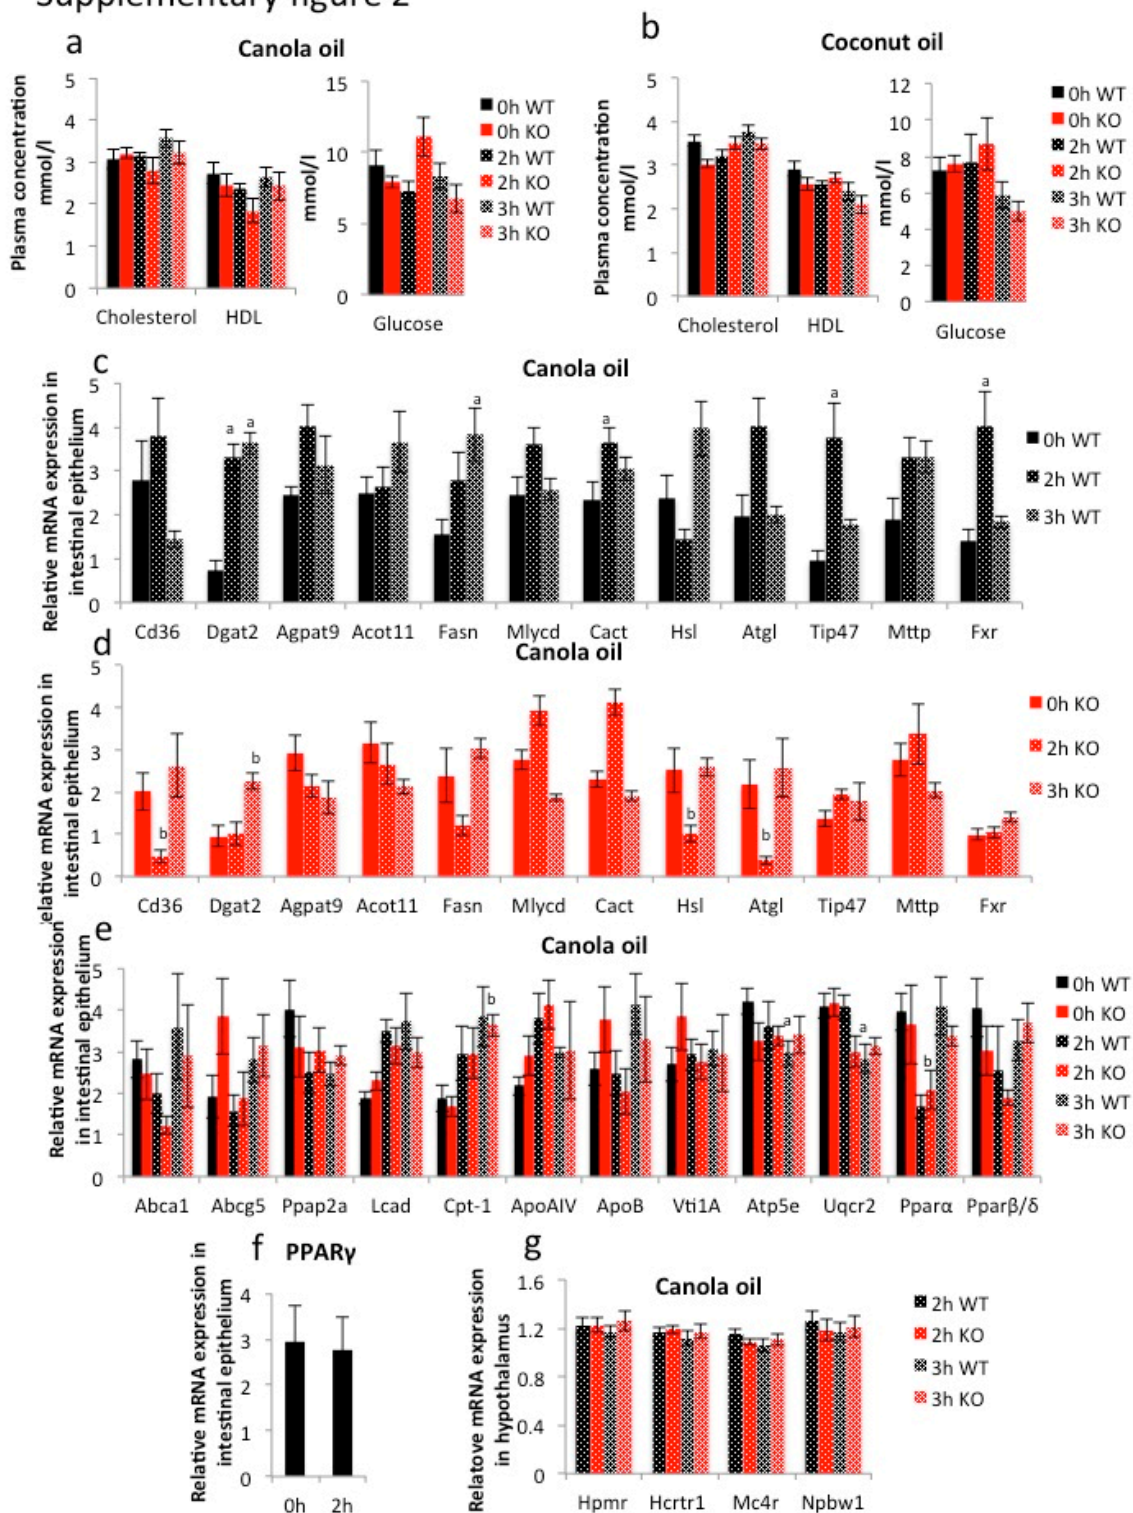

**Figure S2. Plasma, intestine, and hypothalamus properties of iePPAR $\gamma$ KO and WT mice gavaged with oil.** (a) The concentrations of cholesterol, high-density lipoprotein (HDL), and glucose were measured in the plasma of mice gavaged with canola oil (n=6) and (b) coconut oil (n=5-6). (c, d, e, f) The relative mRNA expression levels in the intestinal epithelium (n=5-6) and (g) hypothalamus (n=6-10) were assayed by RT-qPCR. WT mice (c) are compared to iePPAR $\gamma$ KO mice (d) for the same set of genes. The merge of the two graphs is presented in Figure 1f. <sup>a</sup>Significant difference between the labeled group and 0 h WT, <sup>b</sup>significant difference between the labeled group and 0 h KO. The data were analyzed using one-way ANOVA followed by the Bonferroni post-hoc test. Data are presented as mean  $\pm$  SEM.
